# Supplementary material
Source: Springer Nature journal article supplement (https://www.springermedizin.de/resource/supplementary/12891_2007_466_MOESM3_ESM.pdf/9511502)

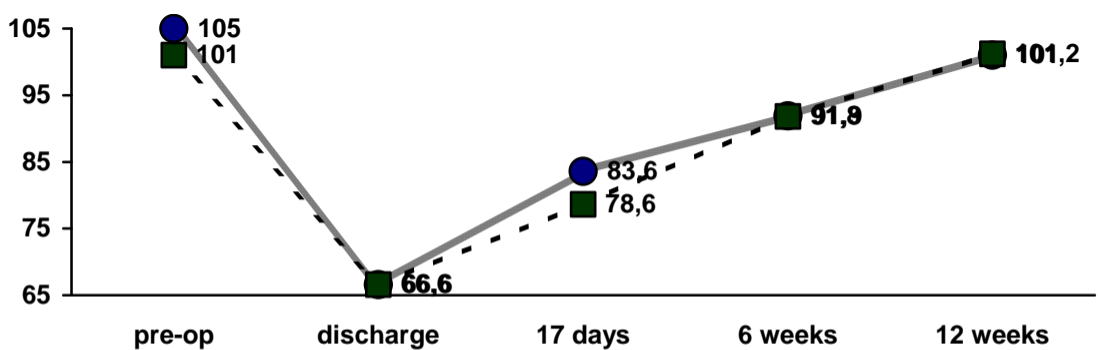

—●— Physiotherapy + CPM

- - ■ - - Physiotherapy

Supplement: MOESM3 [file 9511502]
